# Supplementary material for: Endosymbiotic Bacterial Diversity of Corn Leaf Aphid, Rhopalosiphum maidis Fitch (Hemiptera: Aphididae) Associated with Maize Management Systems
Source: MDPI journal article supplement (doi:10.3390/microorganisms10050939), 2022-04-30
Supplement: s1 [file s1]

**Table S1. Supplementary online materials.** Total bacterial taxa associated with maize fields and *R. maidis*. Values represents DNA sequence numbers.

| Taxon                            | A01 | A02 | A03 | A04 | A05 | A06 | A07 | A08 | A09 | A10 | A11 | A12 | A13 | A14 |
|----------------------------------|-----|-----|-----|-----|-----|-----|-----|-----|-----|-----|-----|-----|-----|-----|
| Acidicapsa                       | 0   | 0   | 0   | 0   | 0   | 0   | 0   | 0   | 0   | 0   | 0   | 19  | 0   | 0   |
| Edaphobacter                     | 0   | 0   | 0   | 0   | 0   | 0   | 0   | 0   | 0   | 0   | 0   | 17  | 0   | 0   |
| Bryobacter                       | 0   | 0   | 0   | 0   | 0   | 2   | 0   | 0   | 0   | 0   | 0   | 20  | 2   | 0   |
| Candidatus_Solibacter            | 0   | 0   | 0   | 0   | 0   | 0   | 0   | 0   | 0   | 0   | 0   | 6   | 0   | 0   |
| Blastocatellaceae_unclassified   | 0   | 0   | 0   | 2   | 0   | 3   | 0   | 0   | 0   | 0   | 0   | 0   | 0   | 0   |
| Subgroup                         | 0   | 0   | 0   | 0   | 0   | 2   | 0   | 0   | 0   | 0   | 0   | 0   | 0   | 0   |
| Vicinamibacteraceae              | 0   | 0   | 0   | 0   | 0   | 2   | 0   | 0   | 0   | 0   | 0   | 48  | 0   | 0   |
| Actinobacteria                   | 0   | 0   | 0   | 0   | 0   | 0   | 0   | 0   | 0   | 1   | 0   | 1   | 0   | 1   |
| Corynebacterium                  | 0   | 0   | 0   | 0   | 0   | 0   | 0   | 0   | 0   | 0   | 0   | 12  | 7   | 0   |
| Lawsonella                       | 0   | 3   | 4   | 4   | 0   | 0   | 0   | 0   | 0   | 0   | 0   | 2   | 0   | 0   |
| Mycobacterium                    | 0   | 0   | 0   | 0   | 0   | 4   | 0   | 0   | 0   | 0   | 0   | 33  | 0   | 0   |
| Rhodococcus                      | 0   | 0   | 0   | 0   | 0   | 0   | 0   | 0   | 0   | 0   | 0   | 27  | 0   | 4   |
| Smaragdicoccus                   | 0   | 0   | 0   | 0   | 0   | 0   | 0   | 0   | 0   | 0   | 0   | 3   | 0   | 0   |
| Jatrophihabitans                 | 0   | 0   | 0   | 0   | 0   | 0   | 0   | 0   | 0   | 0   | 0   | 11  | 0   | 0   |
| Frankiales_unclassified          | 0   | 0   | 0   | 0   | 0   | 0   | 0   | 0   | 0   | 0   | 0   | 21  | 0   | 0   |
| Geodermatophilaceae_unclassified | 0   | 0   | 3   | 0   | 0   | 0   | 0   | 0   | 0   | 0   | 0   | 0   | 0   | 0   |
| Sporichthyaceae_ge               | 0   | 0   | 0   | 0   | 0   | 0   | 4   | 0   | 4   | 1   | 0   | 3   | 11  | 0   |
| Sporichthyaceae_unclassified     | 0   | 0   | 0   | 0   | 0   | 0   | 22  | 3   | 6   | 1   | 0   | 13  | 17  | 7   |
| Quadrisphaera                    | 0   | 0   | 0   | 0   | 0   | 0   | 0   | 0   | 0   | 4   | 0   | 0   | 0   | 0   |
| Intrasporangiaceae_unclassified  | 1   | 0   | 5   | 0   | 0   | 0   | 2   | 0   | 0   | 0   | 0   | 4   | 0   | 0   |
| Jonesia                          | 0   | 0   | 0   | 0   | 0   | 0   | 0   | 0   | 9   | 0   | 0   | 0   | 0   | 0   |
| Candidatus_Aquiluna              | 4   | 2   | 1   | 2   | 3   | 0   | 11  | 1   | 10  | 2   | 0   | 11  | 1   | 0   |
| Curtobacterium                   | 0   | 0   | 0   | 0   | 0   | 0   | 0   | 0   | 0   | 0   | 0   | 0   | 0   | 4   |
| Microbacteriaceae_unclassified   | 28  | 6   | 33  | 16  | 15  | 4   | 21  | 0   | 35  | 5   | 2   | 462 | 0   | 18  |
| Microbacterium                   | 37  | 4   | 0   | 56  | 0   | 0   | 9   | 0   | 78  | 92  | 3   | 0   | 0   | 5   |
| Rathayibacter                    | 0   | 0   | 0   | 0   | 0   | 0   | 0   | 0   | 0   | 16  | 0   | 0   | 0   | 0   |
| Subtercola                       | 0   | 0   | 0   | 0   | 0   | 0   | 0   | 0   | 0   | 0   | 0   | 5   | 0   | 0   |
| Kocuria                          | 0   | 0   | 0   | 0   | 0   | 0   | 0   | 0   | 0   | 0   | 0   | 0   | 0   | 3   |
| Micrococcus                      | 0   | 1   | 0   | 0   | 2   | 0   | 0   | 0   | 10  | 0   | 0   | 0   | 0   | 0   |
| Pseudarthrobacter                | 0   | 0   | 2   | 0   | 0   | 0   | 2   | 0   | 0   | 1   | 0   | 58  | 0   | 3   |

[illegible]

[illegible]



|                                  |    |   |    |    |      |   |    |    |    |      |   |     |    |    |
|----------------------------------|----|---|----|----|------|---|----|----|----|------|---|-----|----|----|
| Tepidisphaera                    | 0  | 0 | 0  | 0  | 0    | 0 | 0  | 0  | 0  | 0    | 2 | 89  | 0  | 0  |
| Fimbriiglobus                    | 0  | 0 | 0  | 0  | 0    | 0 | 0  | 0  | 0  | 0    | 0 | 4   | 0  | 0  |
| Gemmata                          | 0  | 0 | 2  | 0  | 0    | 0 | 0  | 0  | 0  | 0    | 0 | 49  | 0  | 0  |
| Singulisphaera                   | 0  | 0 | 0  | 0  | 0    | 2 | 0  | 0  | 0  | 0    | 0 | 0   | 0  | 0  |
| Pirellula                        | 0  | 3 | 0  | 2  | 0    | 4 | 0  | 0  | 0  | 0    | 0 | 0   | 17 | 3  |
| Acetobacteraceae_unclassified    | 0  | 0 | 0  | 0  | 0    | 9 | 0  | 0  | 0  | 0    | 0 | 0   | 0  | 0  |
| Acidiphilium                     | 0  | 0 | 3  | 0  | 0    | 0 | 0  | 0  | 0  | 0    | 0 | 0   | 0  | 0  |
| Gluconobacter                    | 0  | 0 | 0  | 0  | 0    | 0 | 0  | 0  | 0  | 0    | 0 | 79  | 20 | 0  |
| Roseococcus                      | 0  | 0 | 0  | 3  | 0    | 0 | 0  | 0  | 0  | 0    | 0 | 3   | 0  | 0  |
| Roseomonas                       | 18 | 1 | 0  | 2  | 0    | 0 | 8  | 0  | 8  | 9    | 0 | 0   | 3  | 0  |
| Alphaproteobacteria_unclassified | 2  | 0 | 6  | 4  | 0    | 2 | 0  | 0  | 6  | 17   | 0 | 126 | 4  | 0  |
| Azospirillum                     | 0  | 0 | 0  | 0  | 0    | 0 | 0  | 16 | 0  | 541  | 0 | 0   | 0  | 0  |
| Skermanella                      | 0  | 0 | 0  | 0  | 0    | 0 | 4  | 0  | 0  | 0    | 0 | 0   | 0  | 0  |
| Inquilinus                       | 0  | 0 | 0  | 0  | 0    | 0 | 0  | 0  | 0  | 0    | 0 | 37  | 0  | 0  |
| Asticcacaulis                    | 0  | 0 | 0  | 0  | 0    | 0 | 0  | 0  | 0  | 0    | 0 | 12  | 0  | 0  |
| Brevundimonas                    | 0  | 0 | 0  | 0  | 6    | 3 | 25 | 0  | 0  | 5    | 0 | 27  | 0  | 20 |
| Caulobacter                      | 0  | 0 | 0  | 3  | 0    | 0 | 0  | 0  | 0  | 0    | 0 | 66  | 0  | 0  |
| Caulobacteraceae_unclassified    | 0  | 0 | 5  | 0  | 0    | 3 | 0  | 0  | 3  | 0    | 0 | 3   | 0  | 0  |
| Phenylobacterium                 | 0  | 0 | 0  | 0  | 0    | 0 | 0  | 0  | 0  | 0    | 0 | 20  | 0  | 0  |
| Hyphomonas                       | 0  | 0 | 0  | 0  | 0    | 0 | 3  | 0  | 0  | 0    | 0 | 0   | 0  | 0  |
| Dongia                           | 0  | 0 | 0  | 0  | 0    | 9 | 0  | 0  | 0  | 0    | 0 | 6   | 0  | 1  |
| Candidatus_Paracaedibacter       | 0  | 0 | 0  | 0  | 0    | 0 | 0  | 0  | 5  | 0    | 0 | 0   | 0  | 0  |
| Reyranella                       | 0  | 0 | 0  | 0  | 0    | 6 | 0  | 0  | 0  | 0    | 0 | 10  | 0  | 0  |
| Beijerinckiaceae_unclassified    | 0  | 0 | 0  | 0  | 0    | 0 | 0  | 0  | 0  | 1    | 0 | 0   | 1  | 0  |
| Bosea                            | 0  | 0 | 0  | 0  | 0    | 0 | 1  | 1  | 0  | 0    | 0 | 0   | 0  | 0  |
| Methylobacterium-Methylorubrum   | 0  | 0 | 73 | 2  | 0    | 1 | 0  | 8  | 8  | 15   | 0 | 60  | 0  | 0  |
| Microvirga                       | 0  | 0 | 0  | 2  | 0    | 0 | 0  | 0  | 0  | 0    | 0 | 0   | 0  | 0  |
| Devosia                          | 0  | 4 | 1  | 0  | 1    | 2 | 3  | 0  | 0  | 7    | 0 | 105 | 0  | 0  |
| Devosiaceae_unclassified         | 0  | 0 | 0  | 0  | 0    | 0 | 0  | 0  | 0  | 0    | 0 | 56  | 0  | 0  |
| Hyphomicrobium                   | 0  | 0 | 0  | 0  | 0    | 0 | 0  | 0  | 0  | 0    | 0 | 12  | 0  | 0  |
| Kaistia                          | 0  | 0 | 0  | 0  | 0    | 0 | 2  | 0  | 0  | 0    | 0 | 65  | 0  | 0  |
| Aureimonas                       | 8  | 8 | 48 | 43 | 8    | 3 | 13 | 0  | 65 | 3745 | 1 | 14  | 0  | 14 |
| Mesorhizobium                    | 0  | 0 | 0  | 0  | 0    | 0 | 0  | 0  | 0  | 0    | 0 | 11  | 0  | 0  |
| Ochrobactrum                     | 0  | 0 | 0  | 0  | 1049 | 0 | 0  | 0  | 0  | 0    | 0 | 0   | 1  | 0  |
| Rhizobiaceae_unclassified        | 4  | 0 | 0  | 19 | 15   | 0 | 0  | 0  | 2  | 0    | 0 | 0   | 0  | 0  |

|                                |      |     |     |      |     |    |     |    |      |       |       |       |    |     |
|--------------------------------|------|-----|-----|------|-----|----|-----|----|------|-------|-------|-------|----|-----|
| Rhizobiales_unclassified       | 0    | 0   | 0   | 0    | 4   | 0  | 0   | 0  | 0    | 0     | 0     | 18    | 0  | 0   |
| Bradyrhizobium                 | 0    | 4   | 0   | 0    | 0   | 34 | 3   | 0  | 1    | 6     | 0     | 108   | 0  | 4   |
| Pseudorhodoplanes              | 0    | 2   | 0   | 0    | 0   | 6  | 0   | 0  | 0    | 0     | 0     | 12    | 0  | 0   |
| Rhodoplanes                    | 0    | 0   | 0   | 0    | 0   | 0  | 0   | 0  | 0    | 0     | 0     | 25    | 0  | 0   |
| Tardiphaga                     | 0    | 0   | 0   | 0    | 0   | 0  | 0   | 0  | 0    | 0     | 2     | 228   | 0  | 0   |
| Xanthobacteraceae_unclassified | 0    | 0   | 0   | 0    | 3   | 2  | 0   | 0  | 0    | 0     | 0     | 16    | 0  | 0   |
| Gemmobacter                    | 0    | 0   | 0   | 0    | 0   | 0  | 6   | 0  | 0    | 0     | 0     | 0     | 2  | 0   |
| Paracoccus                     | 0    | 0   | 3   | 0    | 0   | 0  | 0   | 0  | 0    | 0     | 0     | 0     | 0  | 0   |
| Rhodobacter                    | 0    | 0   | 0   | 0    | 0   | 0  | 0   | 3  | 10   | 8     | 0     | 7     | 6  | 0   |
| Rhodobacteraceae_unclassified  | 0    | 0   | 6   | 0    | 0   | 0  | 2   | 0  | 0    | 0     | 0     | 0     | 6  | 0   |
| Tabrizicola                    | 0    | 0   | 0   | 0    | 0   | 0  | 0   | 0  | 0    | 0     | 3     | 0     | 0  | 0   |
| Wolbachia                      | 0    | 0   | 94  | 14   | 0   | 0  | 0   | 0  | 0    | 0     | 16586 | 22362 | 0  | 0   |
| Rickettsiales_unclassified     | 2    | 0   | 0   | 0    | 0   | 0  | 0   | 0  | 0    | 0     | 0     | 0     | 0  | 0   |
| Altererythrobacter             | 0    | 0   | 0   | 0    | 0   | 0  | 0   | 0  | 0    | 0     | 0     | 65    | 0  | 4   |
| Novosphingobium                | 19   | 0   | 0   | 5    | 1   | 0  | 11  | 0  | 0    | 0     | 0     | 88    | 0  | 1   |
| Porphyrobacter                 | 0    | 0   | 0   | 0    | 0   | 0  | 0   | 0  | 0    | 0     | 0     | 0     | 5  | 0   |
| Rhizorhapis                    | 0    | 0   | 0   | 0    | 0   | 0  | 2   | 0  | 0    | 0     | 0     | 0     | 0  | 0   |
| Sandarakinorhabdus             | 0    | 0   | 1   | 0    | 0   | 1  | 3   | 0  | 1    | 0     | 0     | 0     | 9  | 3   |
| Sphingobium                    | 0    | 0   | 0   | 394  | 0   | 0  | 0   | 0  | 0    | 0     | 0     | 57    | 3  | 0   |
| Sphingomonadaceae_unclassified | 0    | 0   | 0   | 0    | 0   | 0  | 2   | 0  | 23   | 2     | 0     | 24    | 0  | 3   |
| Sphingomonas                   | 306  | 153 | 981 | 1028 | 577 | 63 | 541 | 88 | 7501 | 10840 | 18    | 764   | 6  | 420 |
| Sphingorhabdus                 | 0    | 0   | 0   | 1    | 1   | 0  | 0   | 0  | 0    | 0     | 0     | 1     | 0  | 0   |
| Rheinheimera                   | 0    | 0   | 0   | 0    | 0   | 0  | 2   | 0  | 0    | 0     | 0     | 0     | 0  | 0   |
| Pseudoalteromonas              | 0    | 0   | 0   | 0    | 0   | 0  | 0   | 0  | 0    | 0     | 0     | 18    | 0  | 0   |
| Pigmentiphaga                  | 3    | 0   | 0   | 3    | 0   | 0  | 0   | 0  | 0    | 0     | 0     | 0     | 0  | 0   |
| Verticiella                    | 309  | 3   | 0   | 202  | 39  | 0  | 0   | 3  | 224  | 6     | 0     | 0     | 0  | 0   |
| Burkholderiaceae_unclassified  | 0    | 0   | 0   | 0    | 0   | 0  | 2   | 0  | 0    | 0     | 0     | 0     | 0  | 0   |
| Polynucleobacter               | 11   | 4   | 6   | 7    | 7   | 5  | 29  | 11 | 1    | 17    | 11    | 14    | 51 | 23  |
| Ralstonia                      | 0    | 0   | 0   | 0    | 0   | 0  | 0   | 0  | 0    | 0     | 0     | 51    | 0  | 0   |
| Burkholderiales_unclassified   | 2    | 0   | 0   | 0    | 0   | 2  | 0   | 0  | 0    | 0     | 0     | 14    | 2  | 0   |
| Acidovorax                     | 0    | 0   | 0   | 0    | 0   | 0  | 0   | 0  | 14   | 0     | 0     | 0     | 0  | 0   |
| Caenimonas                     | 0    | 0   | 0   | 0    | 0   | 0  | 0   | 0  | 0    | 0     | 0     | 45    | 0  | 0   |
| Comamonadaceae_unclassified    | 1662 | 6   | 174 | 1271 | 94  | 0  | 3   | 27 | 1440 | 47    | 0     | 108   | 0  | 4   |
| Comamonas                      | 483  | 0   | 0   | 0    | 0   | 0  | 0   | 0  | 0    | 0     | 0     | 0     | 0  | 0   |
| Delftia                        | 0    | 0   | 0   | 0    | 0   | 0  | 0   | 0  | 438  | 2     | 0     | 0     | 0  | 0   |

|                                 |      |       |       |      |       |       |       |       |       |       |        |       |        |        |
|---------------------------------|------|-------|-------|------|-------|-------|-------|-------|-------|-------|--------|-------|--------|--------|
| Lampropedia                     | 0    | 0     | 0     | 0    | 26    | 0     | 0     | 0     | 0     | 0     | 0      | 0     | 0      | 0      |
| Leptothrix                      | 0    | 0     | 0     | 0    | 0     | 0     | 0     | 0     | 0     | 0     | 0      | 14    | 0      | 0      |
| Limnohabitans                   | 2    | 0     | 0     | 1    | 0     | 0     | 4     | 1     | 1     | 1     | 0      | 1     | 26     | 17     |
| Paucibacter                     | 0    | 0     | 0     | 0    | 0     | 0     | 0     | 0     | 0     | 0     | 0      | 11    | 0      | 0      |
| Ramlibacter                     | 0    | 0     | 0     | 0    | 0     | 0     | 0     | 0     | 0     | 0     | 0      | 11    | 0      | 0      |
| Rhizobacter                     | 0    | 0     | 0     | 0    | 0     | 0     | 0     | 0     | 0     | 0     | 0      | 19    | 0      | 0      |
| Rhodoferax                      | 0    | 0     | 0     | 0    | 0     | 0     | 0     | 0     | 0     | 0     | 0      | 0     | 2      | 0      |
| Sphaerotilus                    | 0    | 0     | 0     | 0    | 0     | 2     | 0     | 0     | 2     | 0     | 0      | 1     | 0      | 0      |
| Variovorax                      | 15   | 0     | 0     | 71   | 11    | 0     | 515   | 0     | 16    | 23    | 0      | 66    | 0      | 0      |
| Hydrogenophilus                 | 0    | 0     | 4     | 0    | 0     | 0     | 0     | 0     | 0     | 0     | 0      | 0     | 2      | 0      |
| Methylophilaceae_unclassified   | 0    | 0     | 0     | 0    | 0     | 1     | 6     | 0     | 0     | 0     | 0      | 530   | 0      | 1      |
| Methyлотenera                   | 0    | 2     | 5     | 0    | 0     | 0     | 0     | 0     | 0     | 0     | 0      | 2     | 0      | 0      |
| Neisseriaceae_unclassified      | 0    | 0     | 0     | 0    | 0     | 0     | 2     | 0     | 0     | 0     | 0      | 0     | 0      | 0      |
| Ellin6067                       | 0    | 0     | 0     | 0    | 0     | 7     | 0     | 0     | 0     | 0     | 0      | 0     | 0      | 0      |
| Duganella                       | 12   | 4     | 95    | 2481 | 17    | 0     | 280   | 14    | 32    | 1298  | 0      | 1     | 6      | 7      |
| Herbaspirillum                  | 0    | 0     | 1     | 69   | 1     | 0     | 2     | 7     | 7     | 2400  | 1      | 0     | 0      | 0      |
| Massilia                        | 0    | 0     | 0     | 0    | 0     | 3     | 0     | 0     | 0     | 0     | 0      | 48    | 0      | 4      |
| Oxalobacteraceae_ge             | 0    | 0     | 0     | 0    | 0     | 0     | 0     | 0     | 0     | 0     | 0      | 2     | 0      | 0      |
| Oxalobacteraceae_unclassified   | 0    | 0     | 0     | 0    | 0     | 0     | 0     | 0     | 0     | 3     | 0      | 7     | 0      | 0      |
| Cellvibrio                      | 0    | 0     | 0     | 0    | 0     | 0     | 0     | 0     | 0     | 0     | 0      | 32    | 0      | 0      |
| Coxiella                        | 0    | 0     | 0     | 0    | 0     | 0     | 0     | 0     | 0     | 0     | 0      | 6     | 0      | 0      |
| Gibbsiella                      | 0    | 0     | 0     | 3    | 0     | 0     | 0     | 0     | 0     | 0     | 0      | 0     | 0      | 0      |
| Enterobacterales_unclassified   | 13   | 7     | 0     | 32   | 86    | 16    | 365   | 0     | 0     | 0     | 48     | 2     | 0      | 2      |
| Enterobacteriaceae_unclassified | 10   | 0     | 0     | 0    | 0     | 0     | 0     | 0     | 0     | 0     | 0      | 0     | 0      | 0      |
| Raoultella                      | 942  | 0     | 0     | 0    | 27    | 0     | 0     | 0     | 0     | 0     | 0      | 0     | 0      | 0      |
| Erwinia                         | 5762 | 877   | 0     | 5805 | 15599 | 5     | 78470 | 117   | 11    | 56    | 0      | 0     | 23     | 1664   |
| Erwiniaceae_unclassified        | 2    | 0     | 0     | 47   | 49    | 0     | 226   | 0     | 0     | 0     | 0      | 0     | 0      | 0      |
| Rosenbergiella                  | 0    | 0     | 0     | 0    | 0     | 0     | 13    | 0     | 0     | 0     | 0      | 4     | 1117   | 4      |
| Buchnera                        | 1852 | 77628 | 77706 | 3778 | 10808 | 72051 | 63720 | 70886 | 24704 | 18610 | 12136  | 62604 | 122689 | 114848 |
| Candidatus_Hamiltonella         | 0    | 0     | 0     | 0    | 0     | 0     | 0     | 0     | 0     | 0     | 0      | 0     | 0      | 1969   |
| Moellerella                     | 0    | 0     | 4     | 0    | 0     | 10    | 0     | 0     | 0     | 0     | 0      | 0     | 0      | 0      |
| Morganellaceae_unclassified     | 4    | 14506 | 15988 | 3    | 8     | 51330 | 5     | 1     | 0     | 0     | 7      | 0     | 0      | 34     |
| Pectobacterium                  | 0    | 0     | 4     | 0    | 0     | 0     | 0     | 11    | 0     | 0     | 0      | 0     | 0      | 0      |
| Rahnella1                       | 76   | 0     | 0     | 2    | 180   | 0     | 11    | 0     | 0     | 0     | 0      | 0     | 0      | 0      |
| Serratia                        | 6    | 1     | 41    | 0    | 0     | 0     | 31    | 0     | 0     | 2     | 100837 | 1689  | 3      | 83     |

[illegible]
